# Supplementary material for: Complete plastome sequence of Thalictrum coreanum (Ranunculaceae) and transfer of the rpl32 gene to the nucleus in the ancestor of the subfamily Thalictroideae
Source: PubMed Central journal article supplement (PMC4329224; doi:10.1186/s12870-015-0432-6), 2015-02-05

**Figure S1. Maximum likelihood phylogenetic tree of 52 taxa based on *rpl32* gene sequence.** Bootstrap support values >50% are shown at nodes. Red and black lines indicate nuclear- and plastid-encoded copies of *rpl32* sequences, respectively. Scale bar indicates 0.05 substitutions/site.

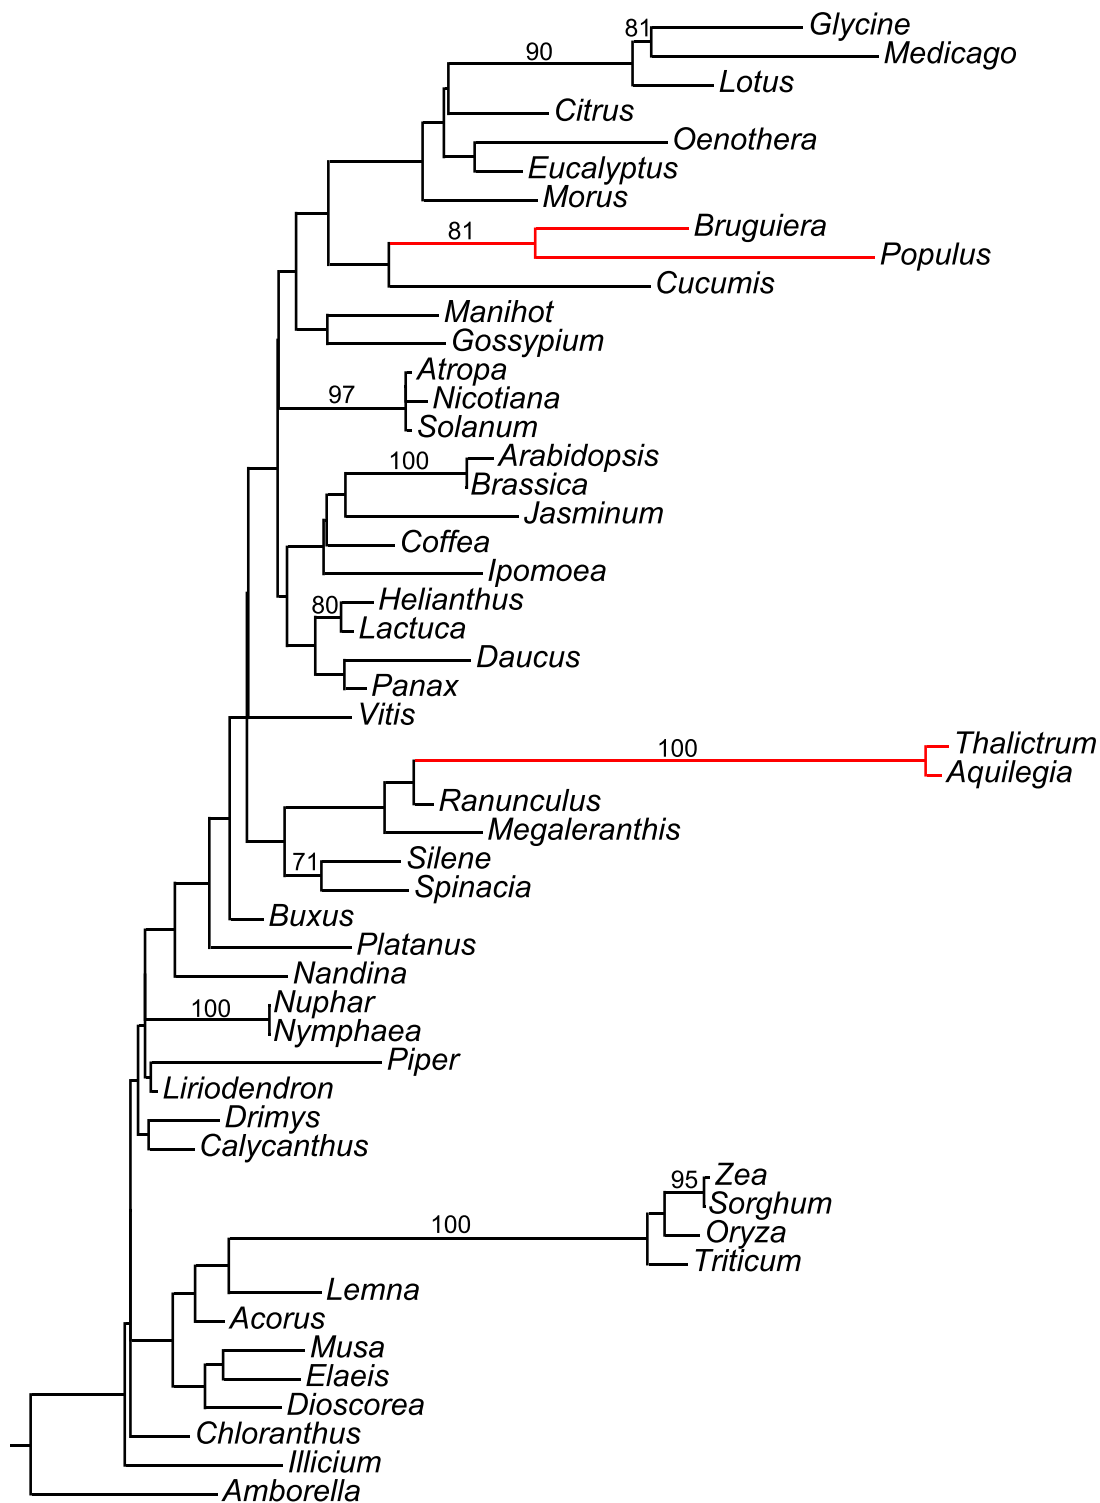

**Figure S2. Alignment of the *infA* gene.** **A.** Nucleotide sequence alignment of nuclear and transcript copies from *Aquilegia*. Intron is highlighted in colors. **B.** Amino acid sequence alignment of the nuclear copies of *rpl32* of *Thalictrum* and *Aquilegia*. Green box indicates plastid transit peptides (TP) that were predicted using TargetP. Red box indicates a conserved domain of translation initiation factor A.

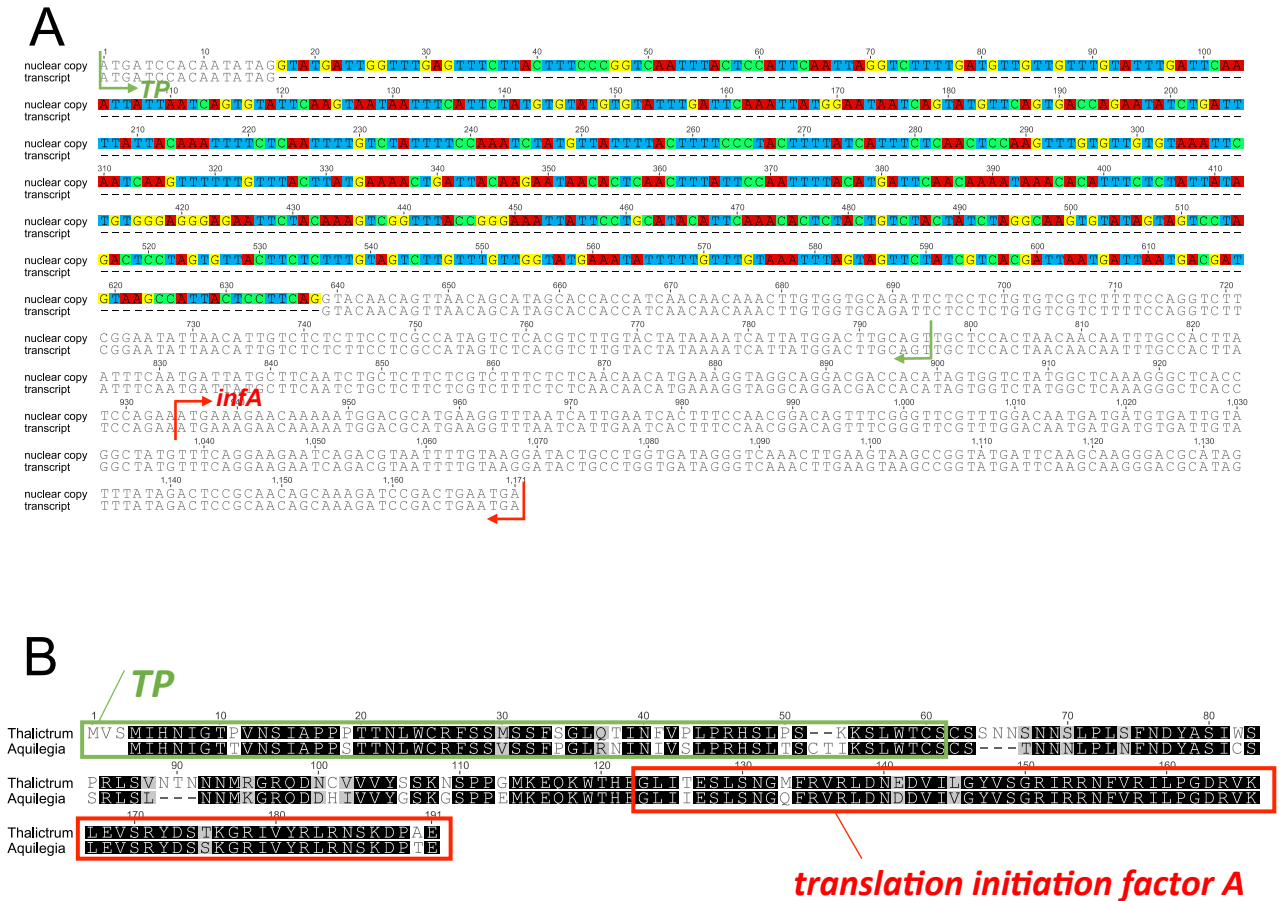

**Figure S3. Maximum likelihood phylogenetic tree inferred from 16 genes from 51 taxa of angiosperms used as a constraint tree for rate comparisons.** Bootstrap support values >50% are shown at nodes. Scale bar indicates 0.01 substitutions/site.

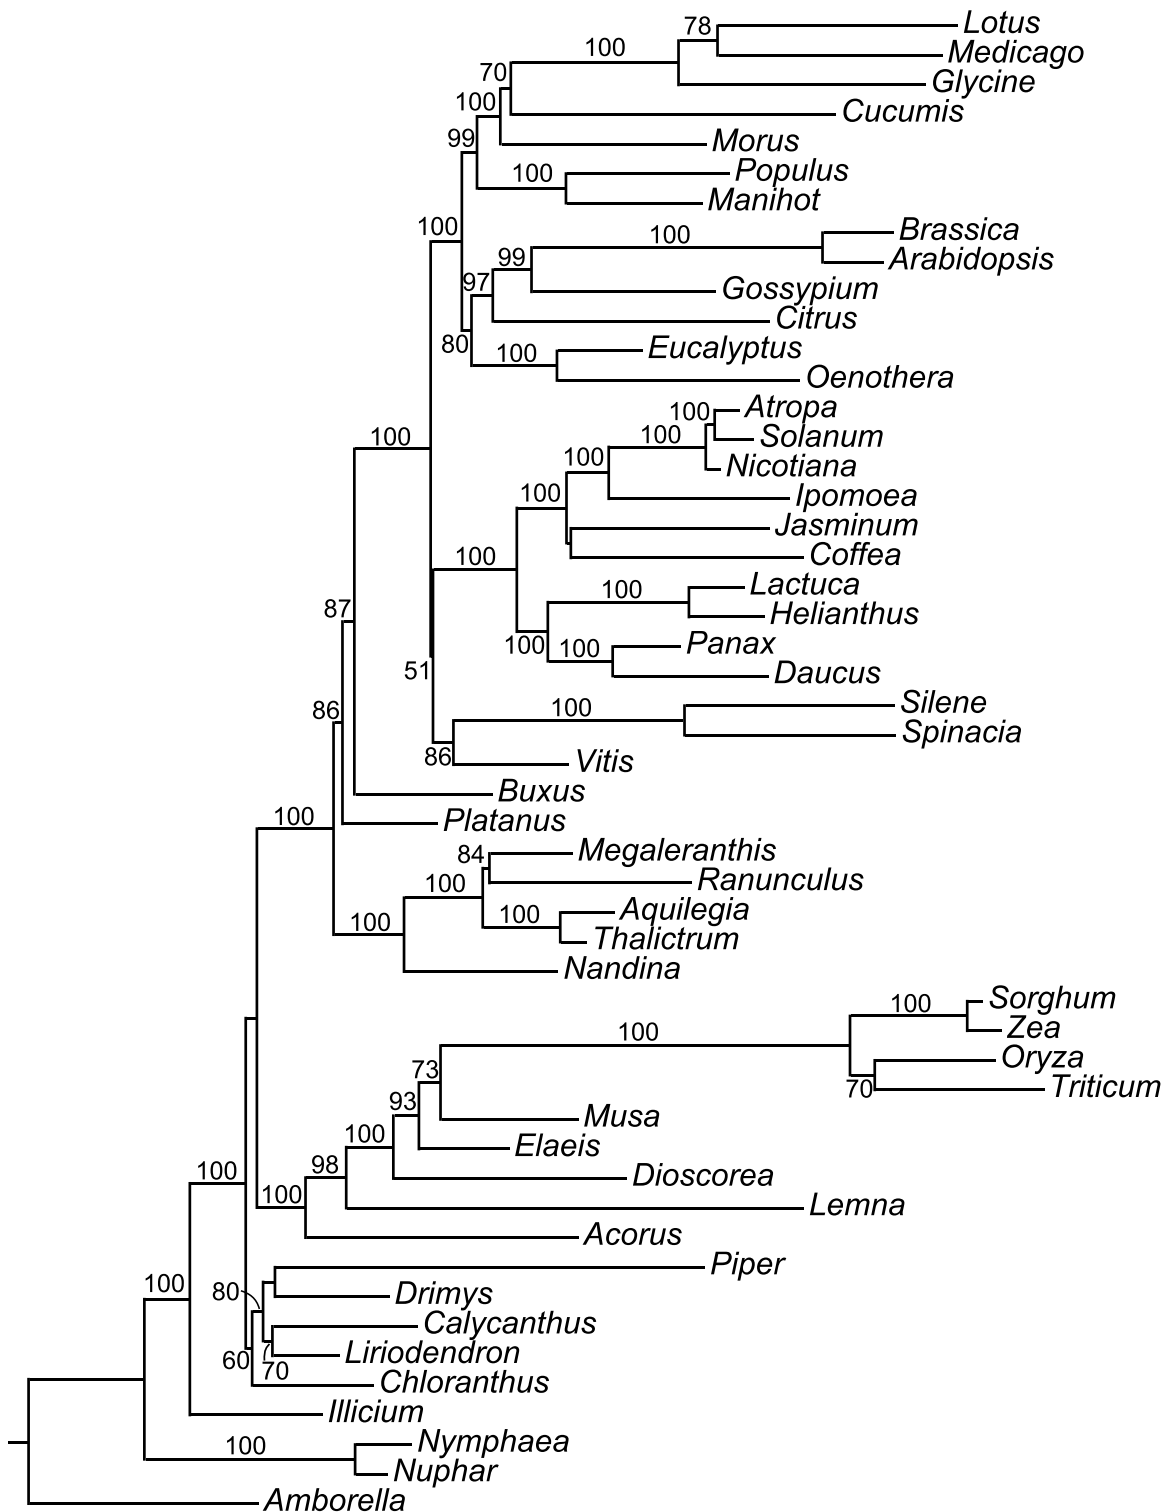

Supplement: 12870_2015_432_MOESM1_ESM.pdf [file 12870_2015_432_MOESM1_ESM.pdf]
