# Supplementary material for: Complete plastome sequence of Thalictrum coreanum (Ranunculaceae) and transfer of the rpl32 gene to the nucleus in the ancestor of the subfamily Thalictroideae
Source: PubMed Central journal article supplement (PMC4329224; doi:10.1186/s12870-015-0432-6), 2015-02-05
Supplement: 12870_2015_432_MOESM2_ESM.pdf [file 12870_2015_432_MOESM2_ESM.pdf]

**Table S1.** Primers used for amplification.

|                     | Primer name | Sequence (5' → 3')                  |
|---------------------|-------------|-------------------------------------|
| <i>Gap filling</i>  | LSC_IRaF    | ACT CTT CGC GCT TTA TGA GCA GAC A   |
|                     | LSC_IRaR    | GCT CAG CAA CAG TCG GAC AAG TGG     |
|                     | SSC_IRaF    | CCC TTC CCC TTC CCT TTG TTC GGA     |
|                     | SSC_IRaR    | TGT AGG TGG AGG GCG CAT ATC TTC T   |
|                     | SSC_IRbF    | ACG TTG ATA GAC TGG GCG GGT ATG T   |
|                     | SSC_IRbR    | CCC TTC CCC TTC CCT TTG TTC GGA     |
|                     | LSC_IRbF    | GAT AGT TTG ATT CTT CGT CGC C       |
|                     | LSC_IRbR    | CGG ATG TAG CCA AGT GGA TC          |
| <i>Homopolymers</i> | rpoC2F1     | CCC GCC CGC TAT TTC ATA CGT GAC     |
|                     | rpoC2F2     | TCC CGG TGG TAT TAA GAT GCC GCT     |
|                     | rpoC2R      | CCC GAG GAA GTG CAT ATA TTA CCC GGA |
|                     | rpoBF       | CCA CCT ATA GTT CCC CGA ACC GCA     |
|                     | rpoBR       | GGG CGC GTG TGA GTA GGA AAC AAA     |
|                     | ndhFF       | TTA ACC ATT TTG ATA ATA TAT CAA     |
|                     | ndhFR       | ATA AAA GCC AGA ACA TGG CTC TTA     |
|                     | ycf1F       | CGT CCC ACT CGG GGA CTT GAA AGA     |
|                     | ycf2R       | ACA ACT GCG CAT TCC CCG CTT TTT     |

**Table S2.** NCBI accession numbers for species included in the phylogenetic analysis based on five plastid regions.

| Taxa                                                                           | <i>rbcL</i> | <i>ndhF</i> | <i>ndhA</i> intron | <i>trnL</i> intron/<br><i>trnL-F</i> IGS |
|--------------------------------------------------------------------------------|-------------|-------------|--------------------|------------------------------------------|
| <i>T. actaeifolium</i> var. <i>brevistylum</i> Nakai                           | JX258330    | KM206570    | JX258545           | JX573433                                 |
| <i>T. alpinum</i> L.                                                           | JX258333    | KM206573    | JX258548           | JX573436                                 |
| <i>T. aquilegifolium</i> var. <i>sibiricum</i> Regel & Tiling                  | JX258336    | KM206576    | JX258551           | JX573439                                 |
| <i>T. calabricum</i> Spreng.                                                   | JX258342    | KM206581    | JX258556           | JX573443                                 |
| <i>T. clavatum</i> DC.                                                         | JX258343    | KM206582    | JX258557           | JX573444                                 |
| <i>T. coreanum</i> H.Lév.                                                      | JX258346    | KM206585    | JX258560           | JX573447                                 |
| <i>T. dasycarpum</i> Fisch. & Avé-Lall.                                        | JX258349    | KM206588    | JX258563           | JX573450                                 |
| <i>T. decipiens</i> B.Boivin                                                   | JX258351    | KM206590    | JX258565           | JX573452                                 |
| <i>T. fargesii</i> Franch. ex Finet & Gagnep.                                  | JX258356    | KM206595    | JX258570           | JX573457                                 |
| <i>T. foeniculaceum</i> Bunge                                                  | JX258359    | KM206598    | JX258573           | JX573460                                 |
| <i>T. galeottii</i> Lecoy.                                                     | JX258362    | KM206601    | JX258576           | JX573463                                 |
| <i>T. grandiflorum</i> Maxim.                                                  | JX258364    | KM206603    | JX258578           | JX573465                                 |
| <i>T. lucidum</i> L.                                                           | JX258371    | KM206610    | JX258585           | JX573472                                 |
| <i>T. minus</i> var. <i>hypoleucum</i> (Siebold & Zucc.) Miq.                  | JX258373    | KM206612    | JX258587           | JQ691515                                 |
| <i>T. petaloideum</i> L.                                                       | JX258379    | KM206618    | JX258593           | JX573479                                 |
| <i>T. pinnatum</i> S.Watson                                                    | JX258380    | KM206619    | JX258594           | JX573480                                 |
| <i>T. pringlei</i> S.Watson                                                    | JX258384    | KM206623    | JX258598           | JX573484                                 |
| <i>T. pubigerum</i> Benth.                                                     | JX258389    | KM206628    | JX258603           | JX573489                                 |
| <i>T. punctatum</i> H.Lév.                                                     | JX258390    | KM206629    | JX258604           | JQ691528                                 |
| <i>T. rhynchocarpum</i> Quart.-Dill. & A.Rich.                                 | JX258394    | KM206633    | JX258608           | JX573493                                 |
| <i>T. rochebrunianum</i> Franch. et Sav.                                       | JX258395    | KM206634    | JX258609           | JX573494                                 |
| <i>T. rutifolium</i> Hook.f. & Thomson                                         | JX258400    | KM206639    | JX258614           | JX573499                                 |
| <i>T. saniculaeforme</i> DC.                                                   | JX258402    | KM206641    | JX258616           | JX573501                                 |
| <i>T. sparsiflorum</i> Turcz.ex Fisch.& C.A.Mey.                               | JX258406    | KM206644    | JX258620           | JQ691522                                 |
| <i>T. texanum</i> (E.Hall ex A.Gray) Small                                     | JX258411    | KM206650    | JX258625           | JX573509                                 |
| <i>T. thalictroides</i> (L.) A.J.Eames & B.Boivin                              | JX258413    | KM206652    | JX258627           | JX573511                                 |
| <i>T. tuberifeum</i> Maxim.                                                    | JX258415    | KM206654    | JX258629           | JX573513                                 |
| <i>T. uchiyamai</i> Nakai                                                      | JX258417    | KM206656    | JX258631           | JX573515                                 |
| <i>T. uncinulatum</i> Franch. ex Lecoy.                                        | JX258419    | KM206658    | JX258633           | JX573517                                 |
| <i>T. virgatum</i> Hook.f. & Thomson                                           | JX258422    | KM206661    | JX258636           | JX573520                                 |
| <i>T. acutifolium</i> (Hand.-Mazz.) B.Boivin                                   | JX258423    | KM206662    | JX258637           | JX573521                                 |
| <i>Enemion raddeanum</i> Regel                                                 | JX258430    | KM206669    | JX258645           | JQ691533                                 |
| <i>Isopyrum manshuricum</i> Kom.                                               | JX258431    | KM206670    | JX258646           | JQ691532                                 |
| <i>Aquilegia buergeriana</i> var. <i>oxysepala</i> (Trautv. & C.A.Mey.) Kitam. | JX258432    | KM206671    | JX258647           | JQ691534                                 |
| <i>Semiaquilegia adoxoides</i> (DC.) Makino                                    | JX258433    | KM206672    | JX258648           | JX573529                                 |
| <i>Paraquilegia microphylla</i> (Royle) J.R.Drumm. & Hutch.                    | JX258434    | KM206673    | JX258649           | JX573530                                 |
| <i>Leptopyrum fumarioides</i> (L.) Reichb.                                     | JX258435    | KM206674    | JX258650           | JX573531                                 |

**Table S3.** Taxon sampling for phylogenetic analyses, estimating nucleotide substitution rates, and examination of the correlation between reduction of *ndhF-trnL* intergenic spacer and *rpl32* gene loss.

| Groups            | Order               | Species                        | NCBI accession numbers |
|-------------------|---------------------|--------------------------------|------------------------|
| Basal Angiosperms | Amborellales        | <i>Amborella trichopoda</i>    | NC_005086              |
|                   | Austrobaileyales    | <i>Illicium oligandrum</i>     | NC_009600              |
|                   | Chloranthales       | <i>Chloranthus spicatus</i>    | NC_009598              |
|                   | Nymphaeales         | <i>Nuphar advena</i>           | NC_008788              |
|                   | Nymphaeales         | <i>Nymphaea alba</i>           | NC_006050              |
| Magnoliids        | Canellales          | <i>Drimys granadensis</i>      | NC_008456              |
|                   | Laurales            | <i>Calycanthus floridus</i>    | NC_004993              |
|                   | Magnoliales         | <i>Liriodendron tulipifera</i> | NC_008326              |
|                   | Piperales           | <i>Piper coenoclatum</i>       | NC_008457              |
| Monocots          | Acorales            | <i>Acorus americanus</i>       | NC_010093              |
|                   | Arecales            | <i>Elaeis guineensis</i>       | NC_017602              |
|                   | Dioscoreales        | <i>Dioscorea elephantipes</i>  | NC_009601              |
|                   | Poales              | <i>Oryza sativa</i>            | NC_001320              |
|                   | Poales              | <i>Sorghum bicolor</i>         | NC_008602              |
|                   | Poales              | <i>Triticum aestivum</i>       | NC_002762              |
|                   | Poales              | <i>Zea mays</i>                | NC_001666              |
|                   | Zingiberales        | <i>Musa textilis</i>           | NC_022926              |
|                   | Alismatales         | <i>Lemna minor</i>             | NC_010109              |
| Eudicots          | Apiales             | <i>Daucus carota</i>           | NC_008325              |
|                   | Apiales             | <i>Panax schinseng</i>         | NC_006290              |
|                   | Asterales           | <i>Helianthus annuus</i>       | NC_007977              |
|                   | Asterales           | <i>Lactuca sativa</i>          | NC_007578              |
|                   | Brassicales         | <i>Arabidopsis thaliana</i>    | NC_000932              |
|                   | Brassicales         | <i>Brassica rapa</i>           | NC_015139              |
|                   | Buxales             | <i>Buxus microphylla</i>       | NC_009599              |
|                   | Caryophyllales      | <i>Spinacia oleracea</i>       | NC_002202              |
|                   | Cucurbitales        | <i>Cucumis sativus</i>         | NC_007144              |
|                   | Fabales             | <i>Glycine max</i>             | NC_007942              |
|                   | Fabales             | <i>Lotus corniculatus</i>      | NC_002694              |
|                   | Fabales             | <i>Medicago truncatula</i>     | NC_003119              |
|                   | Gentianales         | <i>Coffea arabica</i>          | NC_008535              |
|                   | Lamiales            | <i>Jasminum nudiflorum</i>     | NC_008407              |
|                   | Malpighiales        | <i>Bruguiera gymnorhiza</i>    | - / AM711843*          |
|                   | Malpighiales        | <i>Manihot esculenta</i>       | NC_010433              |
| Malpighiales      | <i>Populus alba</i> | NC_008235 / AB302219*          |                        |

|                |                                    |                                                 |
|----------------|------------------------------------|-------------------------------------------------|
| Malvales       | <i>Gossypium hirsutum</i>          | NC_007944                                       |
| Myrtales       | <i>Eucalyptus globulus</i>         | NC_008115                                       |
| Myrtales       | <i>Oenothera elata</i>             | NC_002693                                       |
| Proteales      | <i>Platanus occidentalis</i>       | NC_008335                                       |
| Ranunculales   | <i>Nandina domestica</i>           | NC_008336                                       |
| Ranunculales   | <i>Ranunculus macranthus</i>       | NC_008796                                       |
| Ranunculales   | <i>Megaleranthis saniculifolia</i> | NC_012615                                       |
| Ranunculales   | <i>Thalictrum coreaum</i>          | KM206568 / <sup>a</sup> GBVZ <sup>2008357</sup> |
| Ranunculales   | <i>Aquilegia coerulea</i>          | AC253869                                        |
| Rosales        | <i>Morus indica</i>                | NC_008359                                       |
| Sapindales     | <i>Citrus sinensis</i>             | NC_008334                                       |
| Solanales      | <i>Atropa belladonna</i>           | NC_004561                                       |
| Solanales      | <i>Ipomoea purpurea</i>            | NC_009808                                       |
| Solanales      | <i>Nicotiana tabacum</i>           | NC_001879                                       |
| Solanales      | <i>Solanum tuberosum</i>           | NC_008096                                       |
| Vitales        | <i>Vitis vinifera</i>              | NC_007957                                       |
| Caryophyllales | <i>Silene latifolia</i>            | NC_016730                                       |

---

Asterisk indicates the nuclear encoded *rpl32* genes. <sup>a</sup>The 1000 plants (1KP) database was searched using Blast for identifying the nuclear-encoded *rpl32* gene of *Thalictrum thalictroides*.
